# Supplementary material
Source: PubMed Central journal article supplement (PMC3203697)
Supplement: cr2010181x1.pdf [file cr2010181x1.pdf]

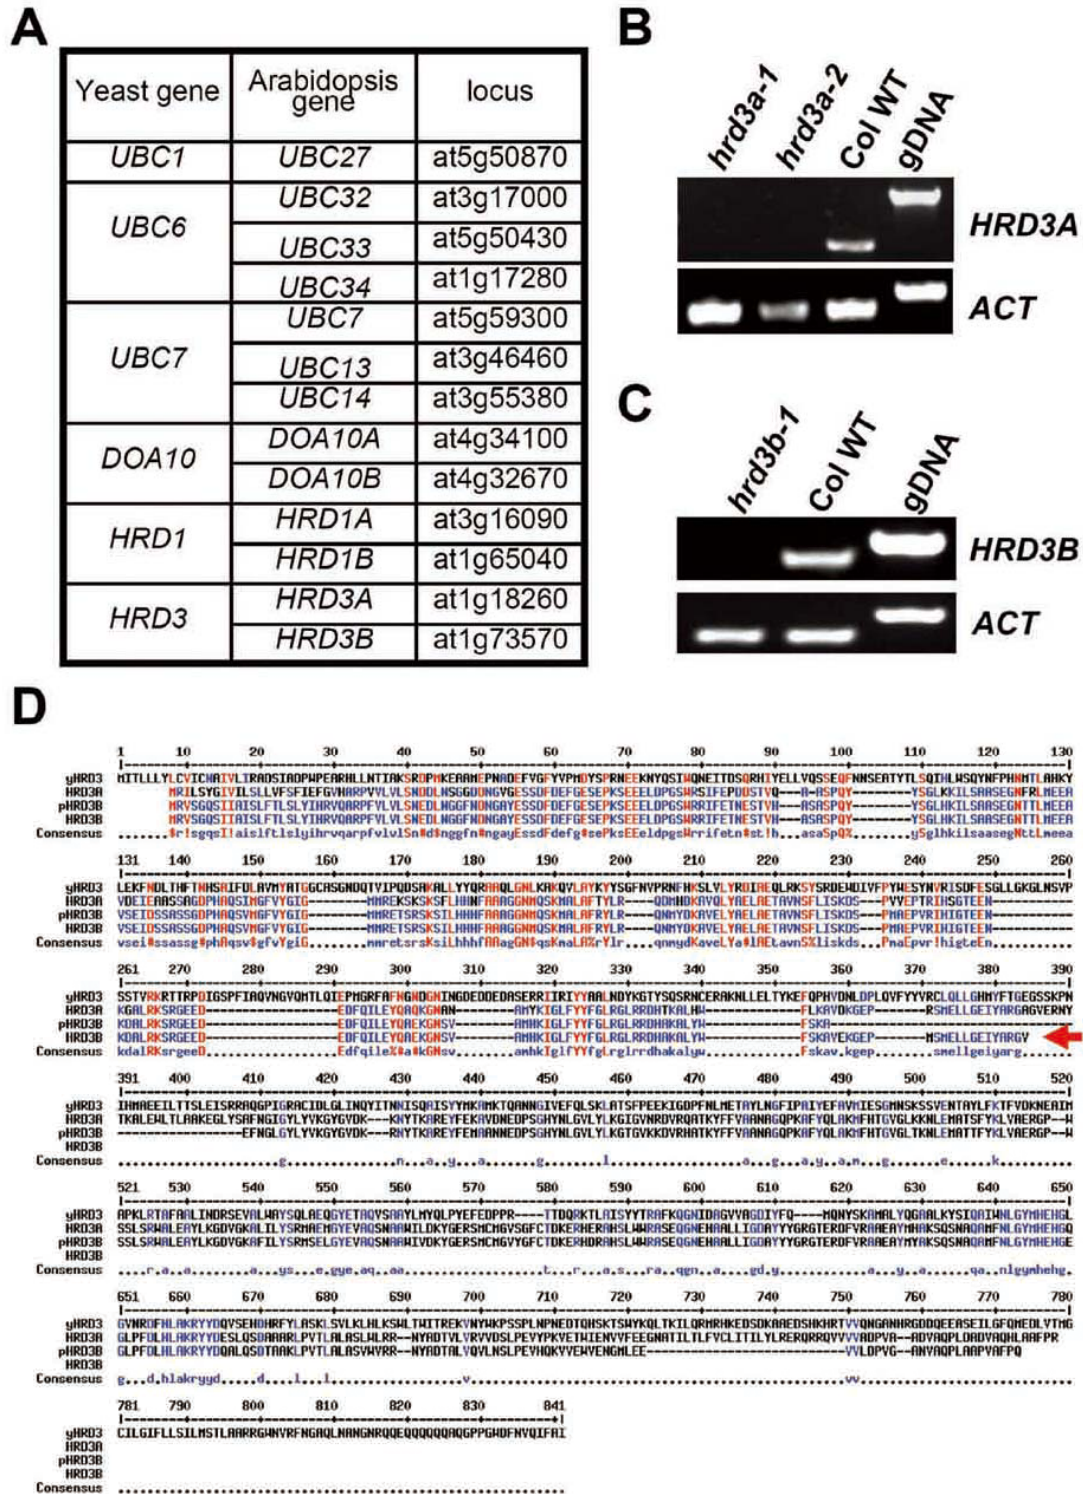

**Supplementary information, Figure S1** Analysis and identification of putative ERAD components in *Arabidopsis*.

(A) *Arabidopsis* homologs of yeast ERAD components. (B) RT-PCR analysis of the HRD3A transcripts in WT and T-DNA insertion mutant seedlings. The primer pairs used for RT-PCR were LP/RP shown in Figure 2 (A). *ACT1N1* was used as an internal

control. **(C)** RT-PCR analysis of the HRD3B transcripts in wild-type and T-DNA insertion mutant seedlings. The primer pairs used for RT-PCR were LP3/RP2 shown in Figure S2 **(A)**. Detection of *ACTIN1* was used as an internal control. **(D)** The alignment of HRD3A, putative HRD3B (pHRD3B), intron-left HRD3B (HRD3B) and yeast HRD3P proteins. The red arrow indicates the terminus of the truncated form of intron-left HRD3B.
