# Supplementary material
Source: PubMed Central journal article supplement (PMC3203697)
Supplement: cr2010181x2.pdf [file cr2010181x2.pdf]

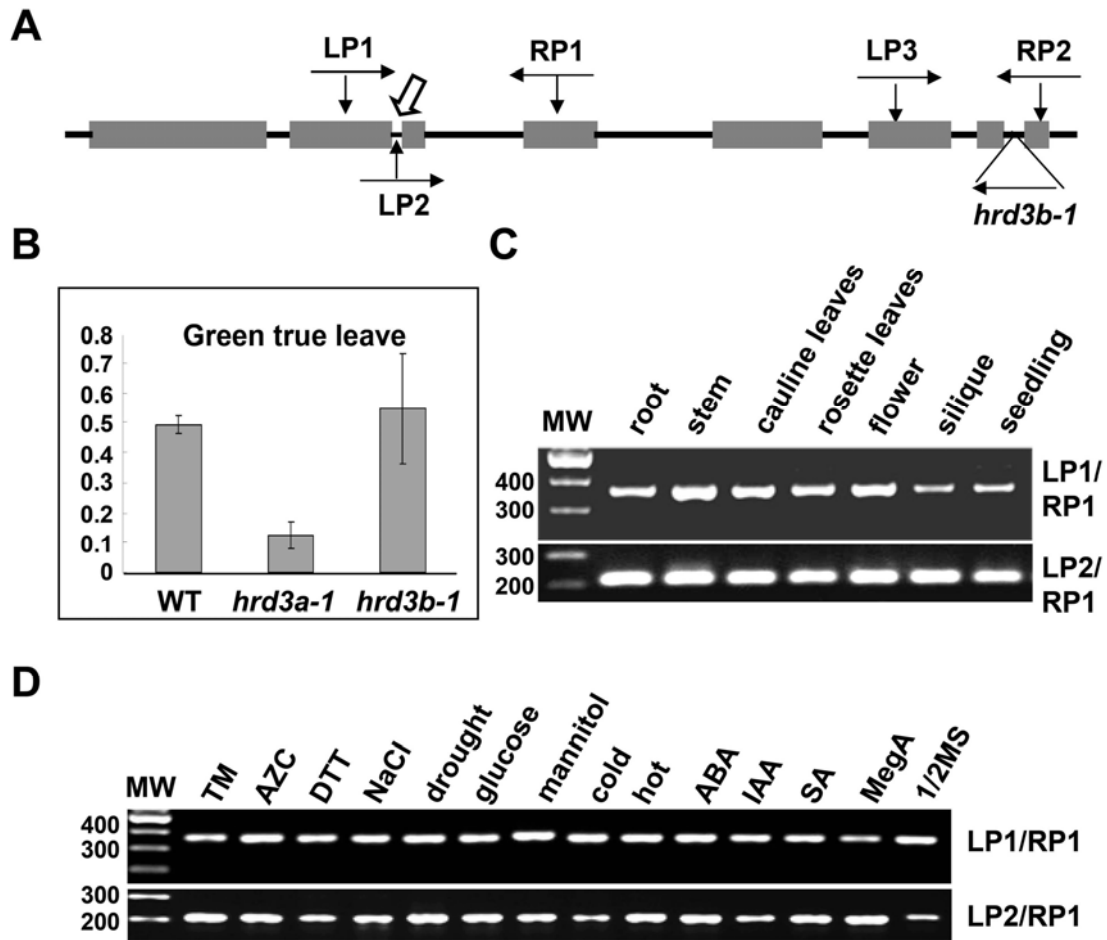

**Supplementary information, Figure S2** *HRD3B* is a putative pseudogene.

**(A)** Schematic diagram of *HRD3B* structure and primers for RT-PCR. Closed boxes represent exons, and lines between closed boxes represent introns. The *hrd3b-1* is the insertion mutant used for the phenotype. LP1, LP2, LP3, forward primer; RP1, RP2, reverse primer. The vertical arrows point to the positions of primers. The empty arrow indicates the remaining intron in the *HRD3B* transcript. **(B)** Growth of *hrd3a*, *hrd3b* mutants on TM plates. Seeds of WT, *hrd3a-1* and *hrd3b-1* were germinated and grown for 8 d on MS medium containing 0.2  $\mu\text{g/ml}$  TM. **(C)** Expression of the intron-left *HRD3B* gene in different tissues of *Arabidopsis* plants. Total RNA was isolated from various tissues grown under long-day growth conditions. RT-PCR was performed with either LP1/RP1 or LP2/RP1 primers as shown in **(A)**. **(D)** Expression of the intron-left *HRD3B* transcripts in response to different treatments. RT-PCR was performed with either LP1/RP1 or LP2/RP1 primers as shown in **(A)**.
