# Supplementary material
Source: PubMed Central journal article supplement (PMC3203697)
Supplement: cr2010181x3.pdf [file cr2010181x3.pdf]

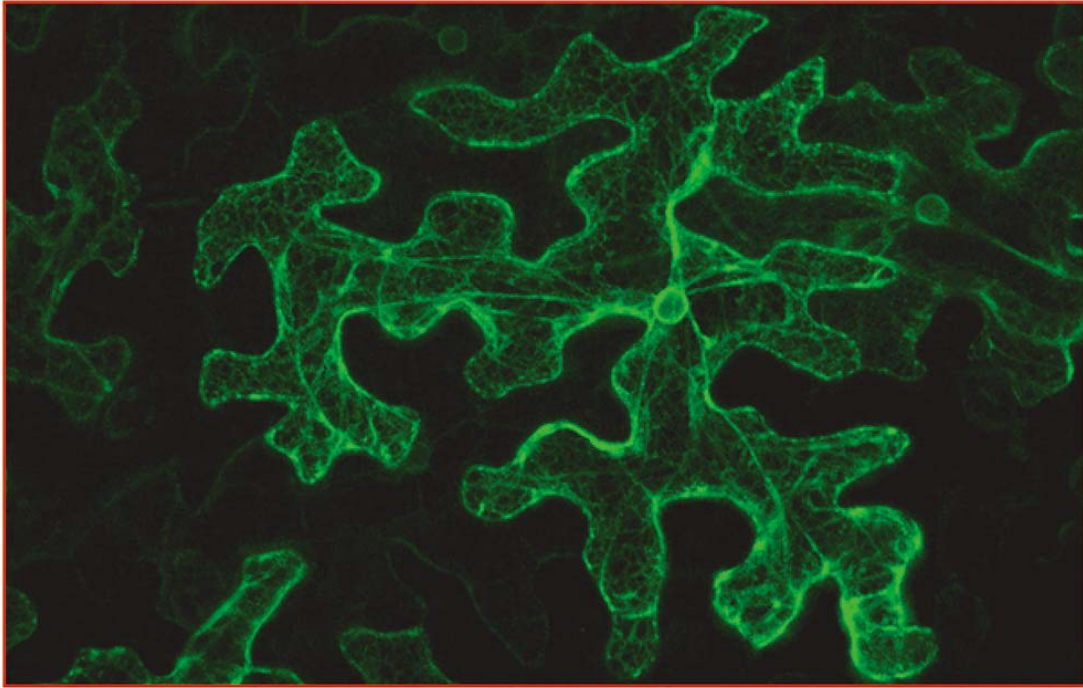

**Supplementary information, Figure S3** The sub-cellular localization of HRD3A-GFP.

35S: *HRD3A-GFP* was infiltrated into tobacco leaves. The green fluorescence signals were observed directly by confocal microscopy after three days of protein expression.
