# Supplementary material
Source: PubMed Central journal article supplement (PMC3203697)
Supplement: cr2010181x4.pdf [file cr2010181x4.pdf]

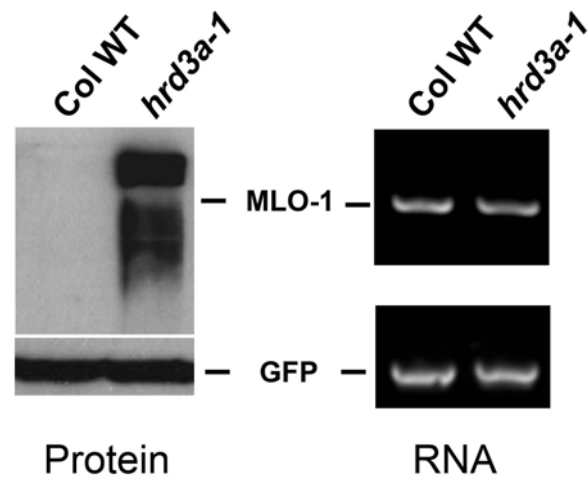

**Supplementary information, Figure S4** Protein levels of Myc-MLO-1 in plant cells.

The plasmids 35S: *Myc-MLO-1* and 35S: *GFP* were co-transfected into the protoplasts prepared from *hrd3a-1* mutant or WT plants. Proteins and RNA were extracted after 24 h. Antibodies to Myc and GFP were used for Western blot analysis. RNA from the protoplasts was used for RT-PCR to determine the mRNA levels of *Myc-MLO-1* and *GFP*.
