# Supplementary material
Source: PubMed Central journal article supplement (PMC3203697)
Supplement: cr2010181x5.pdf [file cr2010181x5.pdf]

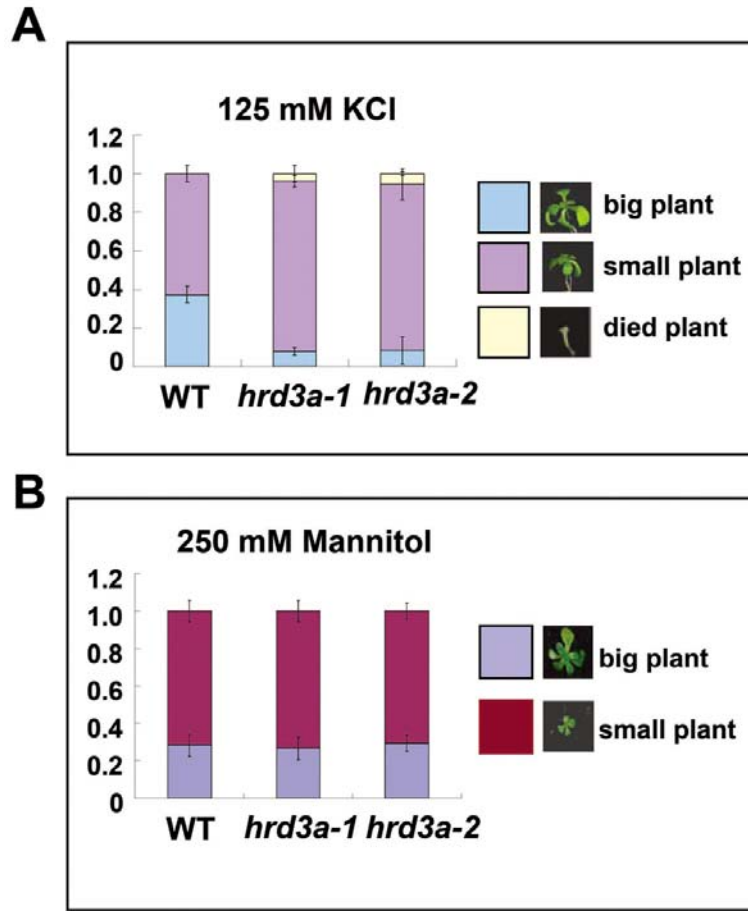

**Supplementary information, Figure S5** Response of plants to KCl and Mannitol treatment.

**(A)** Quantitative analysis of phenotypes of *hrd3a* mutants and WT plants on medium containing 125 mM KCl. Percentages are means ( $n = 60$  each) of three independent repeats. **(B)** Quantitative analysis of phenotypes of *hrd3a* mutants and WT plants on medium containing 250 mM mannitol. Percentages are means ( $n = 60$  each) of three independent repeats.
